# Supplementary material for: Ni/(R2O3,CaO) Nanocomposites Produced by the Exsolution of R1.5Ca0.5NiO4 Nickelates (R = Nd, Sm, Eu): Rare Earth Effect on the Catalytic Performance in the Dry Reforming and Partial Oxidation of Methane
Source: MDPI journal article supplement (doi:10.3390/ma15207265), 2022-10-18
Supplement: s1 [file s1]

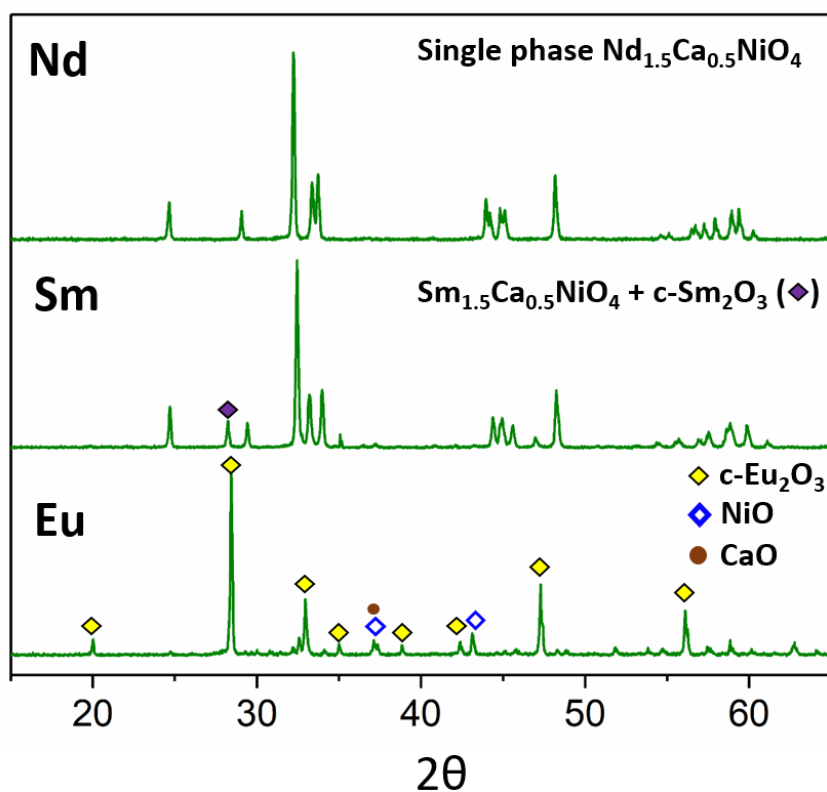

Figure S1. XRD plots of  $\text{R}_{1.5}\text{Ca}_{0.5}\text{NiO}_4$  samples obtained at 1000 °C. Crystalline phases have been assigned based on following ICDD data:  $\text{c-Sm}_2\text{O}_3$  (# 00-015-0813),  $\text{c-Eu}_2\text{O}_3$  (# 00-034-0392),  $\text{NiO}$  (# 00-047-1049) and  $\text{CaO}$  (# 00-037-1497)

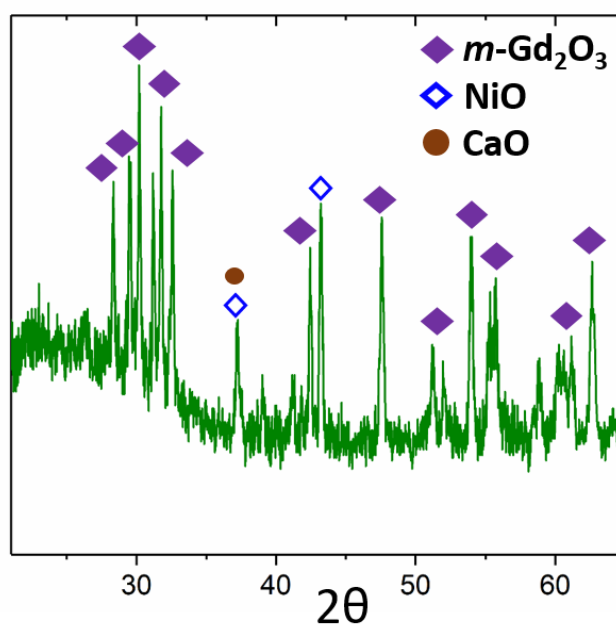

Figure S2. XRD plot of " $\text{Gd}_{1.5}\text{Ca}_{0.5}\text{NiO}_4$ " sample obtained at 1350 °C. Crystalline phases have been assigned based on following ICDD data:  $m\text{-Gd}_2\text{O}_3$  (# 00-042-1465),  $\text{NiO}$  (# 00-047-1049) and  $\text{CaO}$  (# 00-037-1497)
